# Supplementary material for: A robust method for critical micelle concentration determination using coumarin-6 as a fluorescent probe
Source: Royal Society of Chemistry journal article supplement (doi:10.1039/c9ay00577c), 2019-01-01
Supplement: c9ay00577c1.pdf [file c9ay00577c1.pdf]

# **A robust method for critical micelle concentration determination using coumarin-6 as a fluorescent probe.**

Arnon Fluksman<sup>1</sup>, Ofra Benny<sup>1\*</sup>

\*Author for correspondence: [OfraB@ekmd.huji.ac.il](mailto:OfraB@ekmd.huji.ac.il)

<sup>1</sup>Department of Medicine, Institute for Drug Research, School of Pharmacy, Faculty of Medicine, The Hebrew University of Jerusalem, Jerusalem, Israel

**Supplementary Figures**

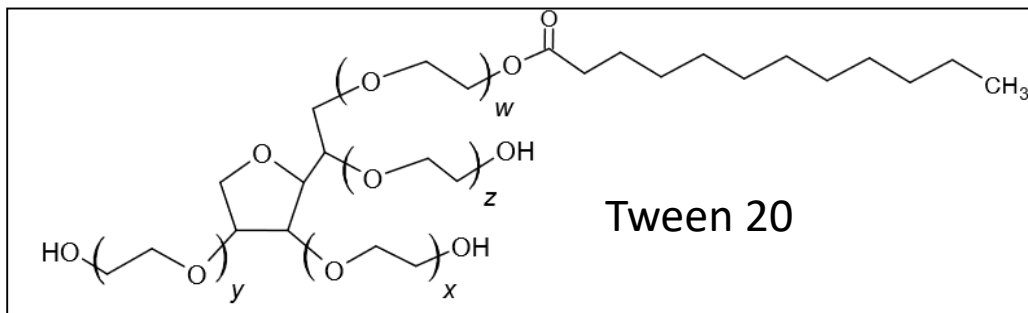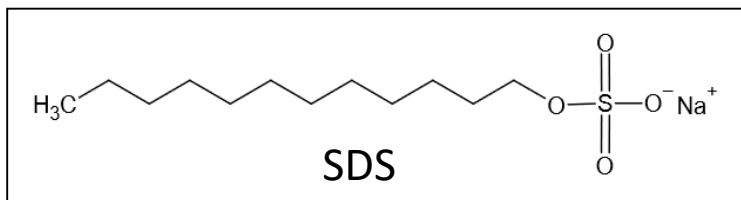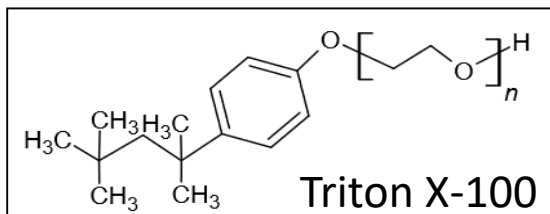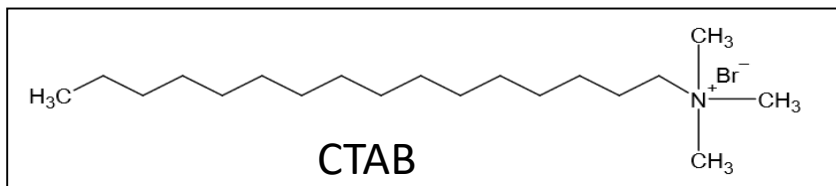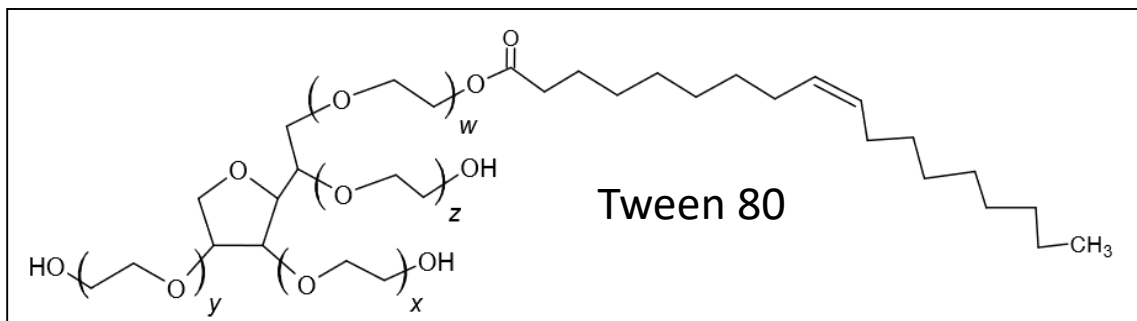

**Supplementary Figure 1S.** Chemical structures of the tested surfactants.

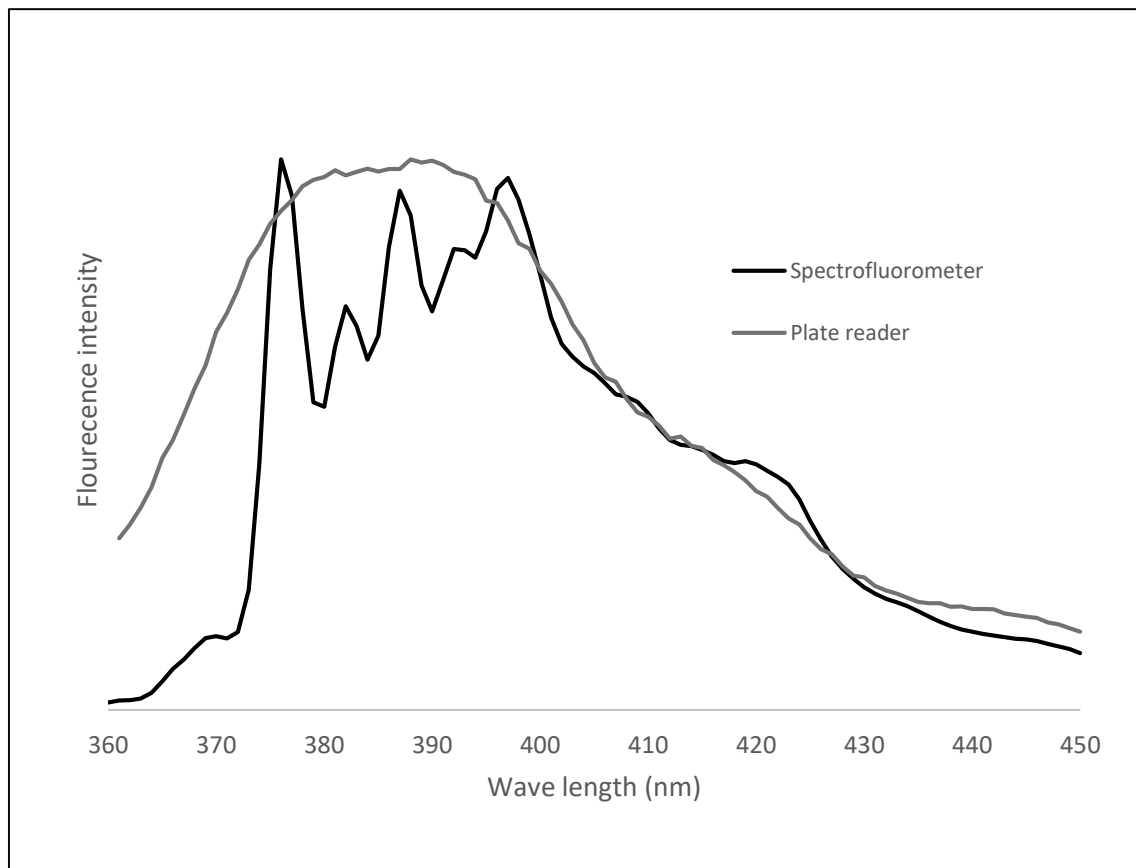

**Supplementary Figure 2S.** Fluorescence intensity of pyrene with 5% SDS checked by both spectrofluorometer in a quartz vial (black) and by a plate reader in a 96 well black plate (grey) at a range of 360-450 nm. The figure shows the distinct separation between the peaks only when using a quartz vial, while plate reader measurements cannot detect the difference.
